# Supplementary material for: Bridging the translational divide: identical cognitive touchscreen testing in mice and humans carrying mutations in a disease-relevant homologous gene
Source: PubMed Central journal article supplement (PMC4589696; doi:10.1038/srep14613), 2015-10-01
Supplement: srep14613-s1.pdf [file srep14613-s1.pdf]

## Supplemental Information

### **Bridging the translational divide: identical cognitive touchscreen testing in mice and humans carrying mutations in a disease-relevant homologous gene**

**Authors:** J. Nithianantharajah<sup>1,2#</sup>, A.G. McKechnie<sup>3,4</sup>, T.J. Stewart<sup>4</sup>, M. Johnstone<sup>4</sup>, D.H. Blackwood<sup>4</sup>, D. St Clair<sup>5</sup>, S.G.N. Grant<sup>1,2\*</sup>, T.J. Bussey<sup>6\*</sup> & L.M. Saksida<sup>6\*</sup>

<sup>1</sup>Genes to Cognition Programme, Centre for Clinical Brain Sciences & Centre for Neuroregeneration, University of Edinburgh, Chancellors Building, 47 Little France Crescent, Edinburgh UK EH16 4SB

<sup>2</sup>Genes to Cognition Programme, Wellcome Trust Sanger Institute, Hinxton Cambridgeshire UK CB10 1SA

<sup>3</sup>The Patrick Wild Centre, University of Edinburgh, Royal Edinburgh Hospital, Edinburgh UK EH10 5HF

<sup>4</sup>Division of Psychiatry, University of Edinburgh, Royal Edinburgh Hospital, Edinburgh UK EH10 5HF

<sup>5</sup>Institute of Medical Sciences, University of Aberdeen, Aberdeen UK AB25 2ZD

<sup>6</sup>Department of Psychology, University of Cambridge & The MRC and The Wellcome Trust Behavioral and Clinical Neuroscience Institute, University of Cambridge, Cambridge UK CB2 3EB

<sup>#</sup>Current address: Florey Institute of Neuroscience and Mental Health, University of Melbourne, Parkville Victoria Australia 3052

\* These authors co-supervised the project

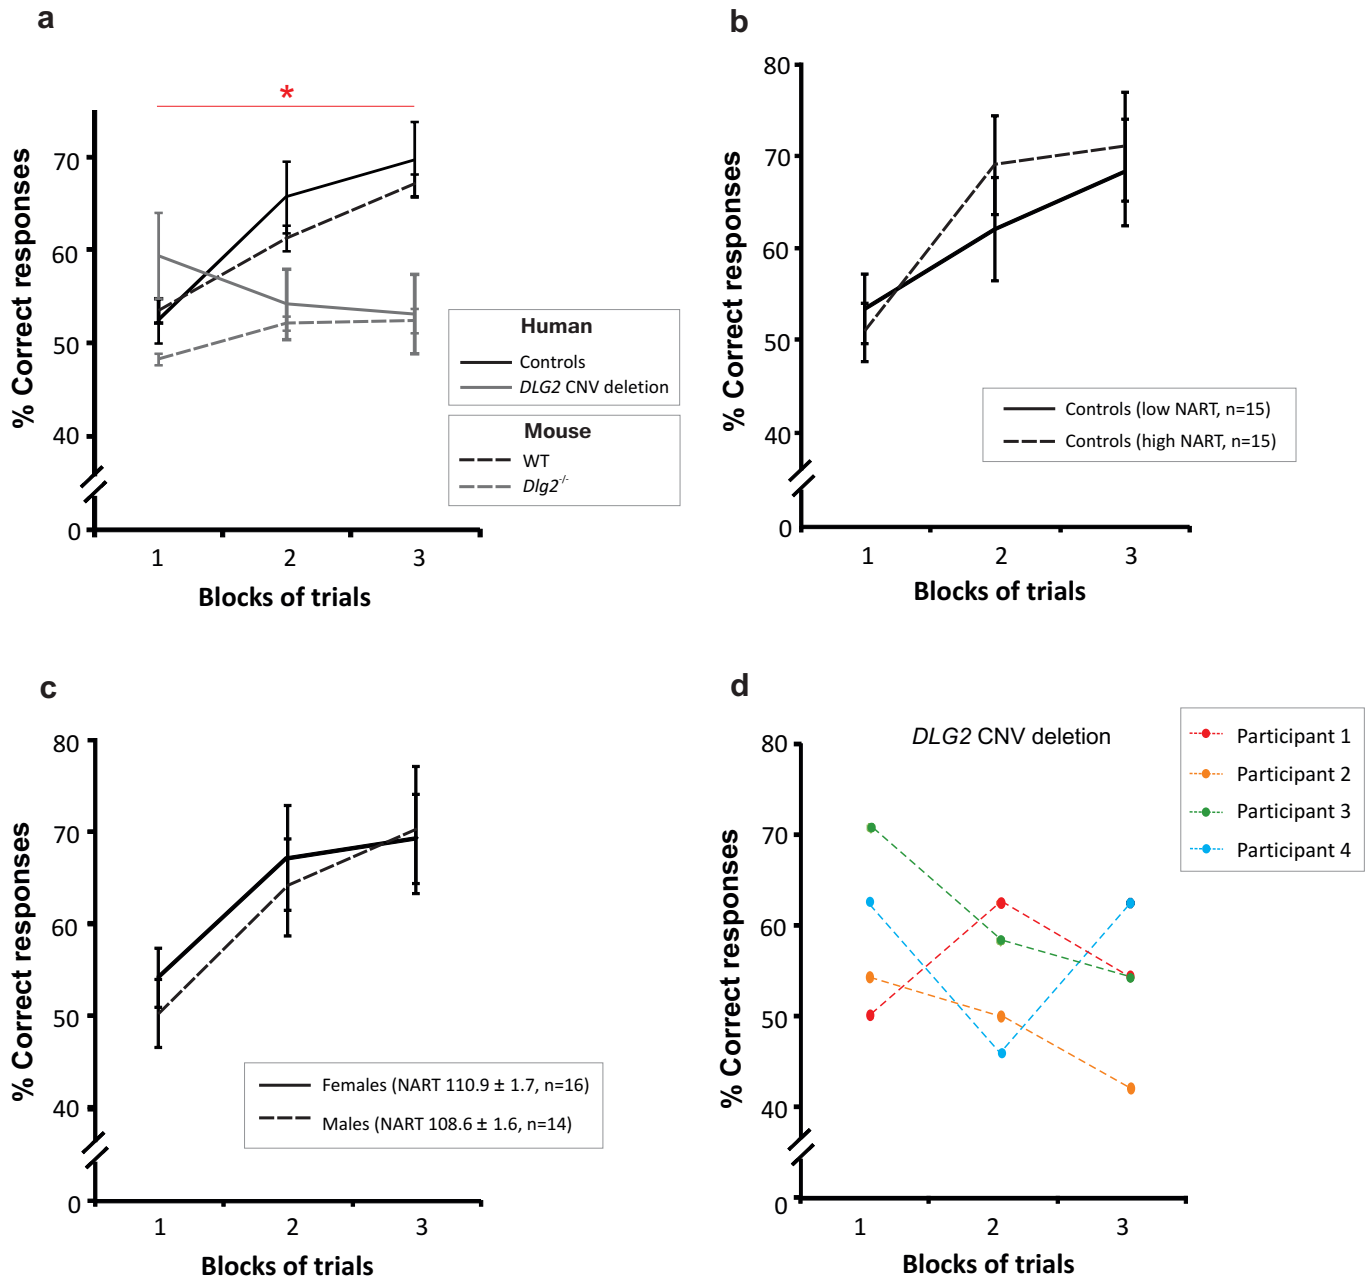

**Supplementary Figure 1: Performance of controls and *DLG2* CNV deletion participants on the rodent touchscreen object-location paired associates task.**

**a.** Direct comparison of mouse to human performance showed a significant genotype x block interaction (\* $p=0.005$ ), but no differences between species ( $p=0.443$ ).

**b.** Control group performance (percentage of correct responses) across blocks of trials based on median split of NART scores (low NART = 95-110; high NART = 110-120) showed no significant differences ( $p=0.69$ ).

**c.** Control group performance based on gender also showed no differences ( $p=0.74$ ).

**d.** Scatter plot of performance of individual *DLG2* CNV subjects indicates none of the 4 subjects showed the progressive acquisition and increase in performance across blocks of trials observed in the control group.
